# Supplementary material
Source: PubMed Central journal article supplement (PMC6394391)

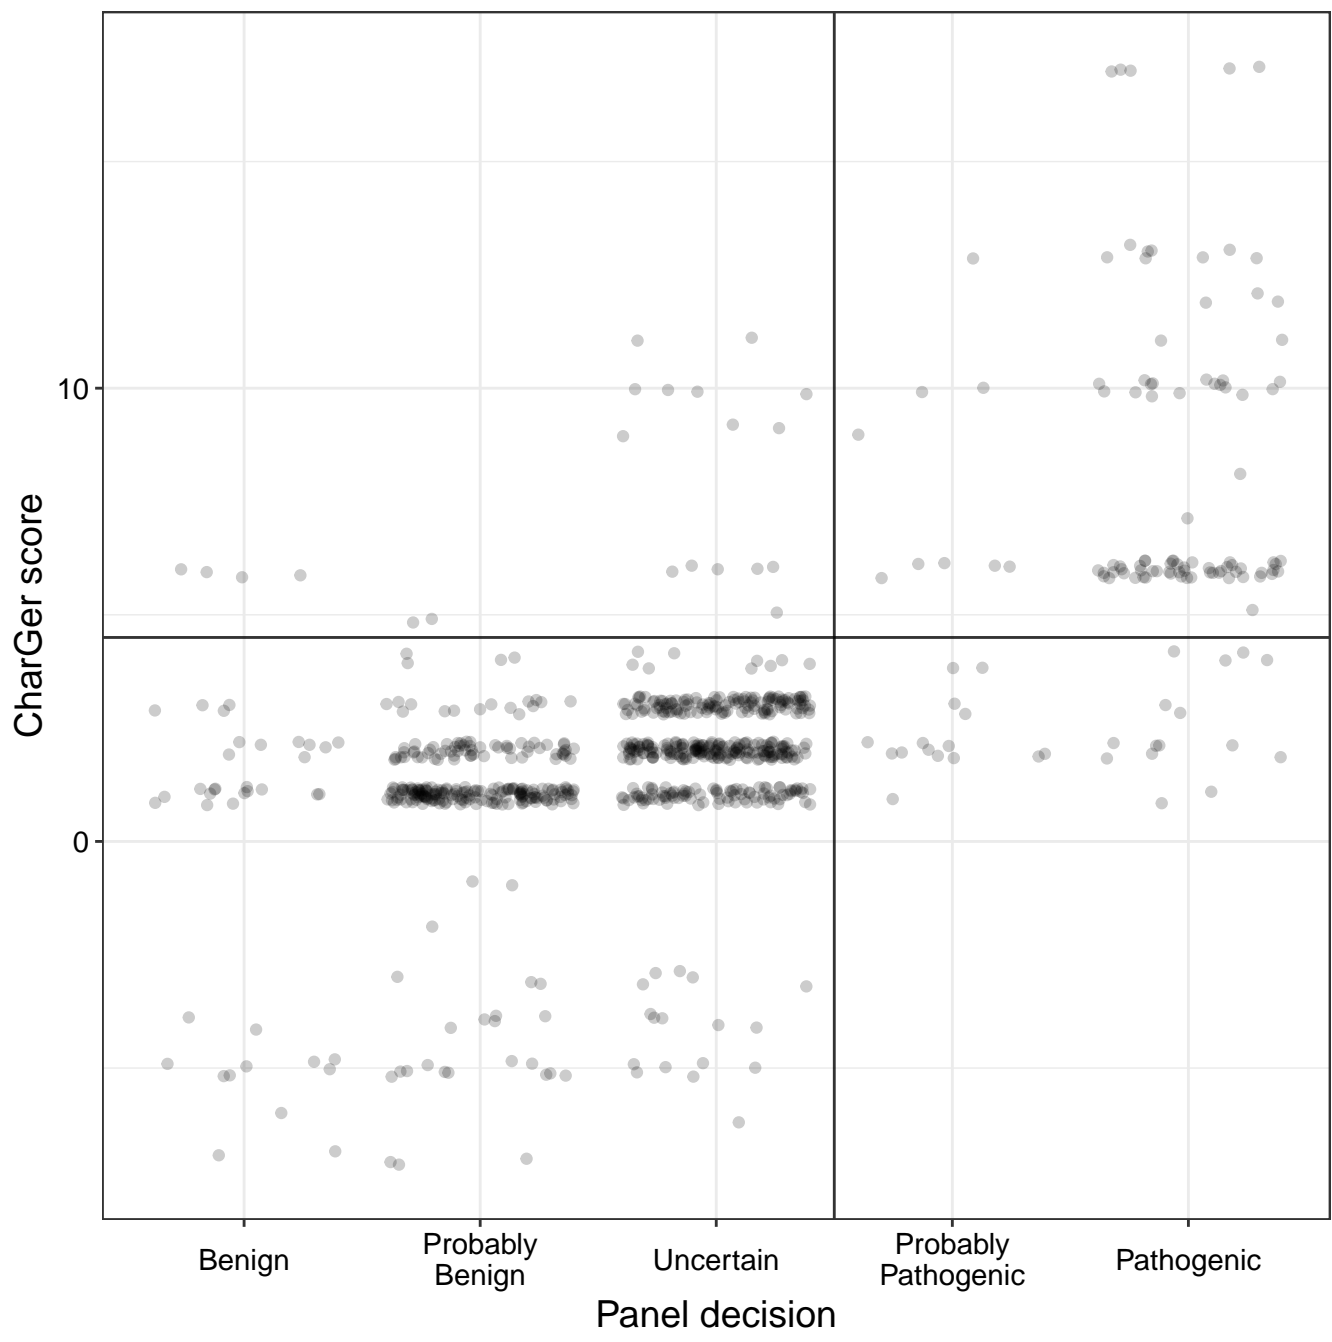

Supplement: bty649_supplementary_figure_1.pdf [file bty649_supplementary_figure_1.pdf]
